# Supplementary material for: Crystal orientation-ordered ZnO nanorod bundles on hexagonal heads of ZnO microcones: epitaxial growth and self-attraction
Source: Royal Society of Chemistry journal article supplement (doi:10.1039/b512259g), 2005-11-17
Supplement: b512259g.pdf [file b512259g.pdf]

## Supplementary data

### Crystal Orientation-Ordered ZnO Nanorod Bundles on Hexagonal Heads of ZnO

#### Microcones: Epitaxial Growth and Self-attraction

*XinHai Han<sup>1,2</sup>, Guanzhong Wang<sup>1,2</sup>, Lei Zhou<sup>3</sup>, and J.G. Hou<sup>1</sup>*

*1. Hefei National Laboratory for Physical Sciences at Microscale, University of Science and Technology of China, Hefei, Anhui, 230026, P. R. China*

*2. Department of Physics, University of Science and Technology of China, Hefei, Anhui, 230026, P. R. China*

*3. The Wallace H. Coulter Department of Biomedical Engineering, Georgia Tech/Emory University, Atlanta, Georgia 30322, USA*

Low-magnification FE-SEM images of the ZnO bundles before (S1) and after self-attraction (S2).

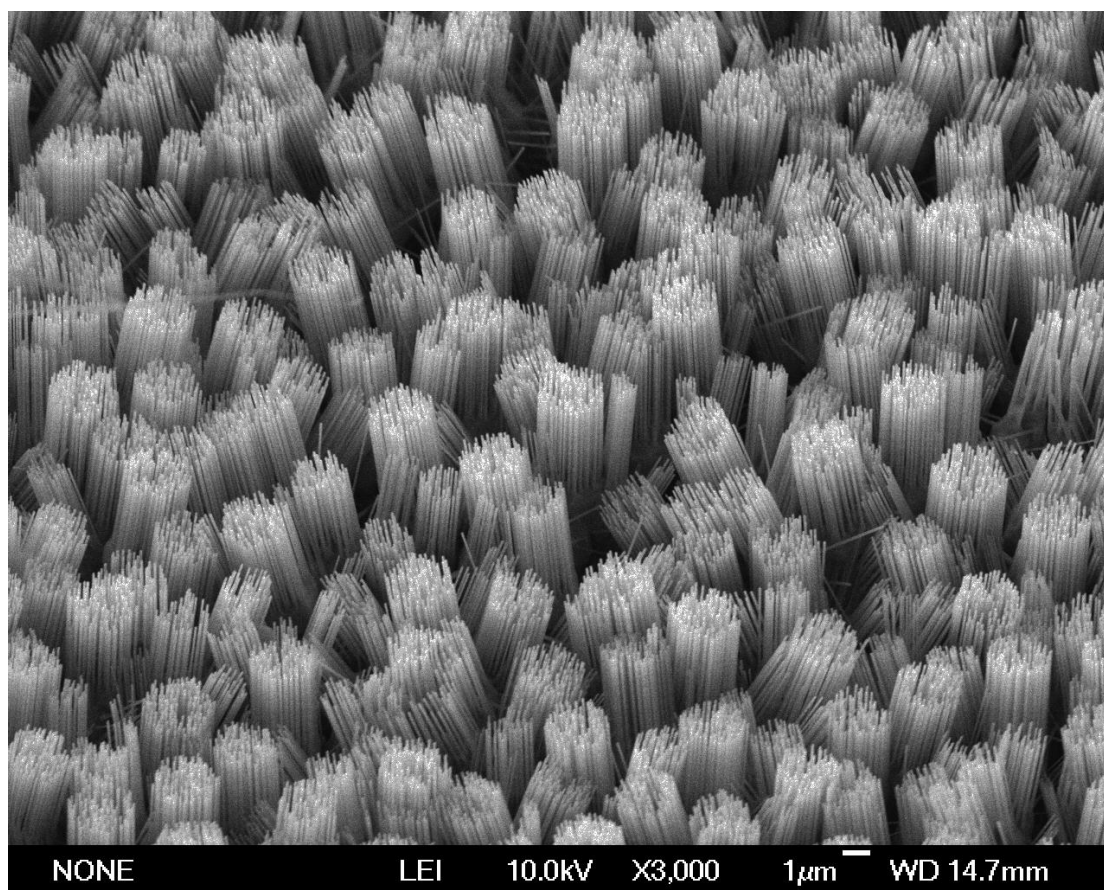

Figure S1

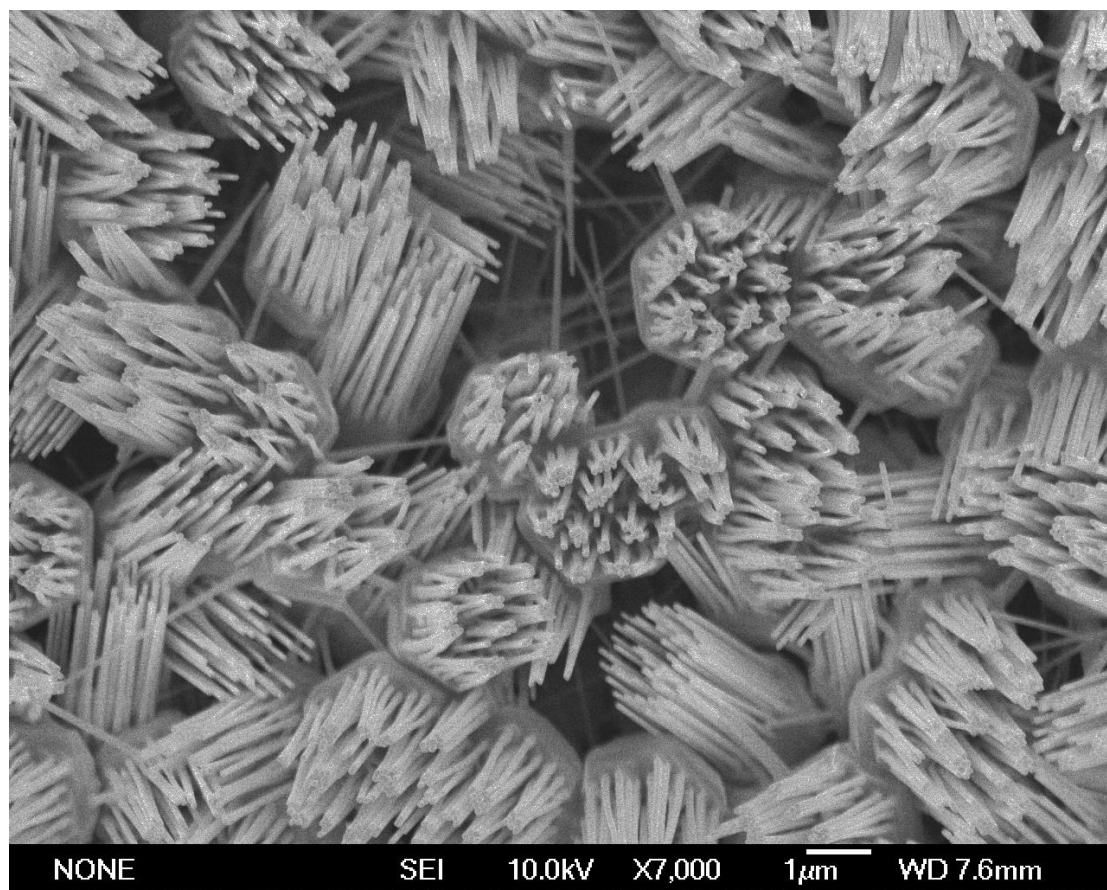

Figure S2
